# Supplementary material for: Myocardial Mitochondrial DNA Drives Macrophage Inflammatory Response through STING Signaling in Coxsackievirus B3-Induced Viral Myocarditis
Source: MDPI journal article supplement (doi:10.3390/cells12212555), 2023-10-31
Supplement: s1 [file s1]

# Supplementary Figure S1

A

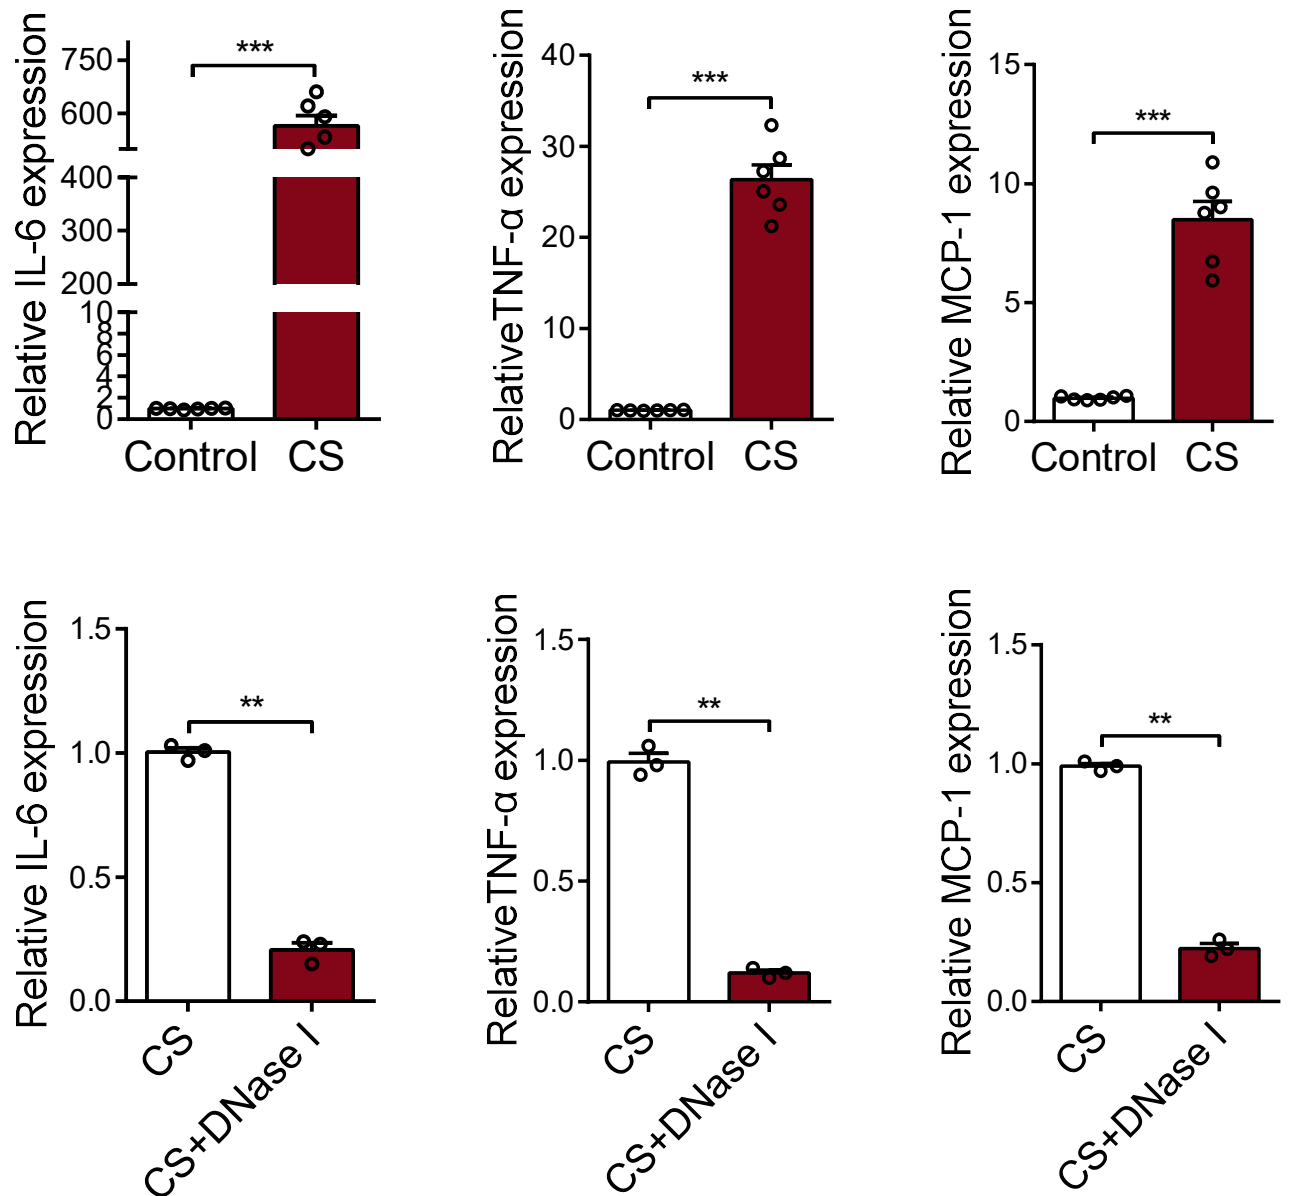

## Figure S1. Myocardial mtDNA induces macrophage inflammatory

**responses** (A) BMDMs were cultured with conditioned medium using culture supernatant (CS) from CVB3-infected cardiomyocytes, and detected for IL-6, TNF-α, and MCP-1 expressions by qPCR. Mean ± SEM from 6 independent experiments in each group. (B) CS from CVB3-infected cardiomyocytes were pretreated with or without DNase I, and subsequently incubated with BMDMs for analyzing the inflammatory responses. Mean ± SEM from 3 independent experiments in each group. \*\*p < 0.01, \*\*\*p < 0.001 with *t*-test.
